# Supplementary material for: Enhanced photodegradation performance based on the surface plasmon resonance effect of Ag/Ca2Al2SiO7:Pr3+ ultraviolet long afterglow driven in a photo-Fenton system
Source: Royal Society of Chemistry journal article supplement (doi:10.1039/d5tc00486a), 2025-01-01
Supplement: d5tc00486a1.pdf [file d5tc00486a1.pdf]

## Supporting information

# Enhanced photodegradation performance based on surface plasmonic resonance effect of Ag/Ca<sub>2</sub>Al<sub>2</sub>SiO<sub>7</sub>: Pr<sup>3+</sup> ultraviolet long afterglow driven in photo-Fenton system

Xiaoxuan Fan,<sup>a</sup> Yonggui Zheng,<sup>a</sup> Zimin Yao,<sup>a</sup> Pingping Liang,<sup>b</sup> Xuemei Lu,<sup>a</sup> Jianbo Xu,<sup>a</sup> Baijie Guan,<sup>a</sup> Tianya Tan,<sup>a</sup> Shuo Cao,<sup>a</sup> Yang Zhao,<sup>a</sup> Kexin Wang,<sup>a,\*</sup> Feifei Yin,<sup>a,\*</sup> Jiwei Wang,<sup>a,\*</sup>

<sup>a</sup> College of Physics, Liaoning University, Shenyang, 110036, China

<sup>b</sup> School of Mechanical and Civil Engineering, Jilin Agricultural Science and Technology University, Jilin, 132101, China

E-mail: wyf93jl@163.com (Kexin Wang); yffyww@yeah.net (Feifei Yin); wangjiwei@lnu.edu.cn (Jiwei Wang)

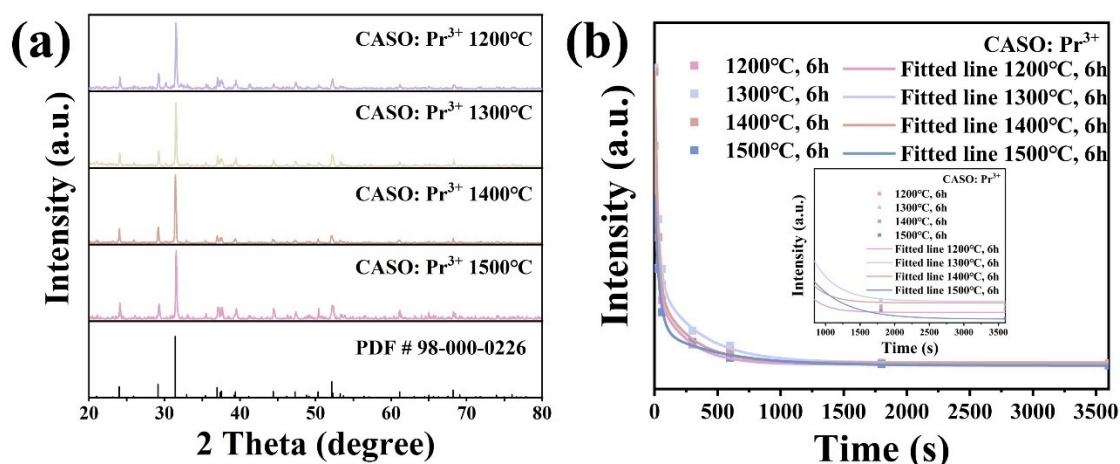

**Fig. S1** (a) XRD patterns of CASO: Pr<sup>3+</sup> in different temperature. (b) Long afterglow luminescence decay curves of the CASO: Pr<sup>3+</sup> in different temperature.

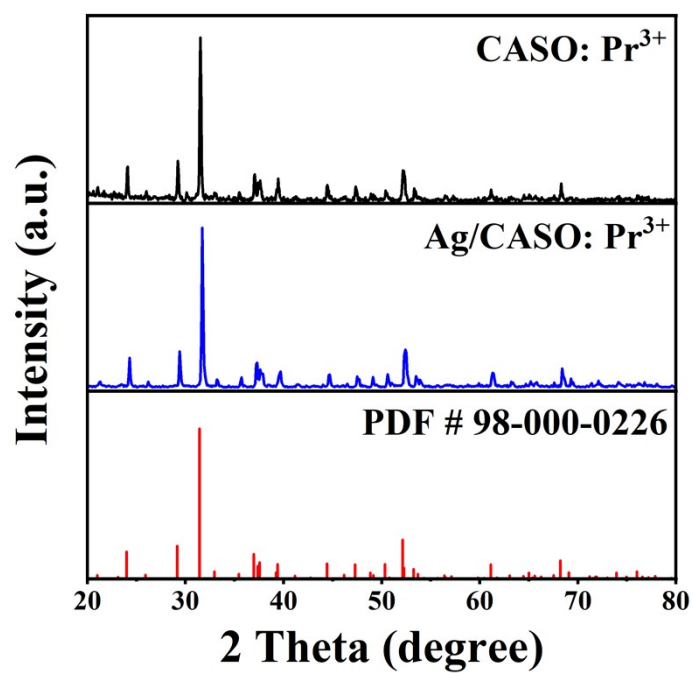

Fig. S2 XRD patterns of CASO: Pr<sup>3+</sup>, Ag/CASO: Pr<sup>3+</sup> and CASO host (PDF # 98-000-0226).

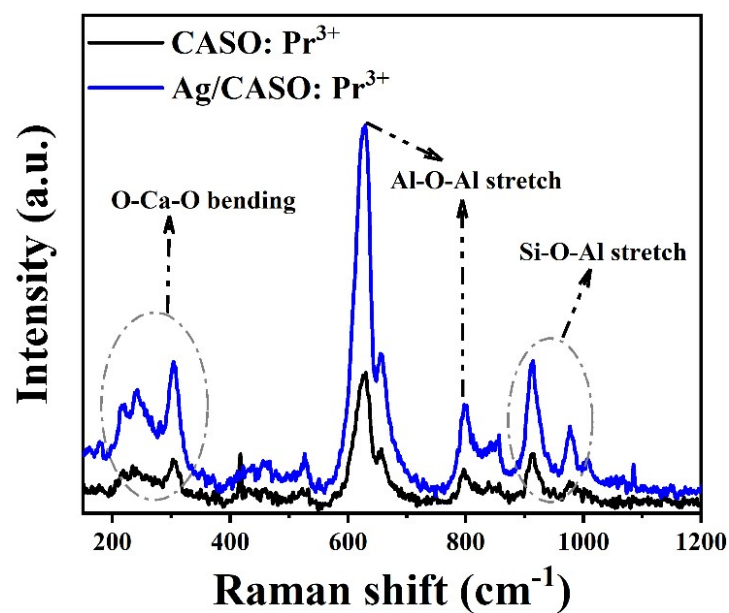

Fig. S3 Raman spectra of CASO: Pr<sup>3+</sup> and Ag/CASO: Pr<sup>3+</sup>.

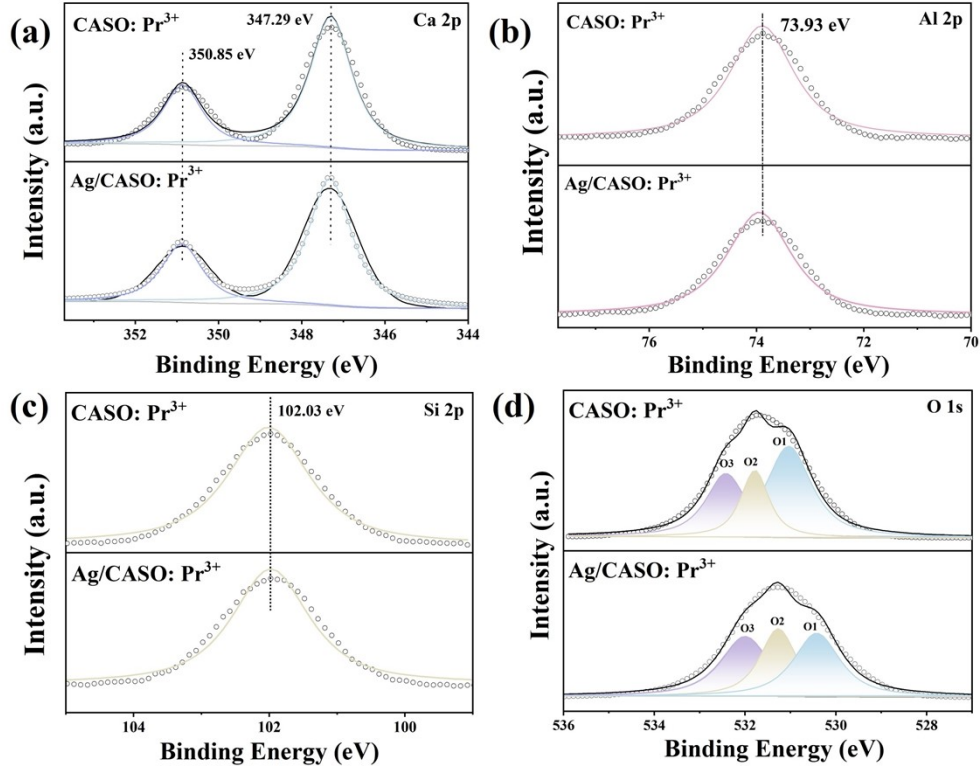

**Fig. S4** XPS of (a) Ca 2p, (b) Al 2p (c) Si 2p, (d) O 1s in CASO: Pr<sup>3+</sup> and Ag/CASO: Pr<sup>3+</sup> long afterglow phosphor.

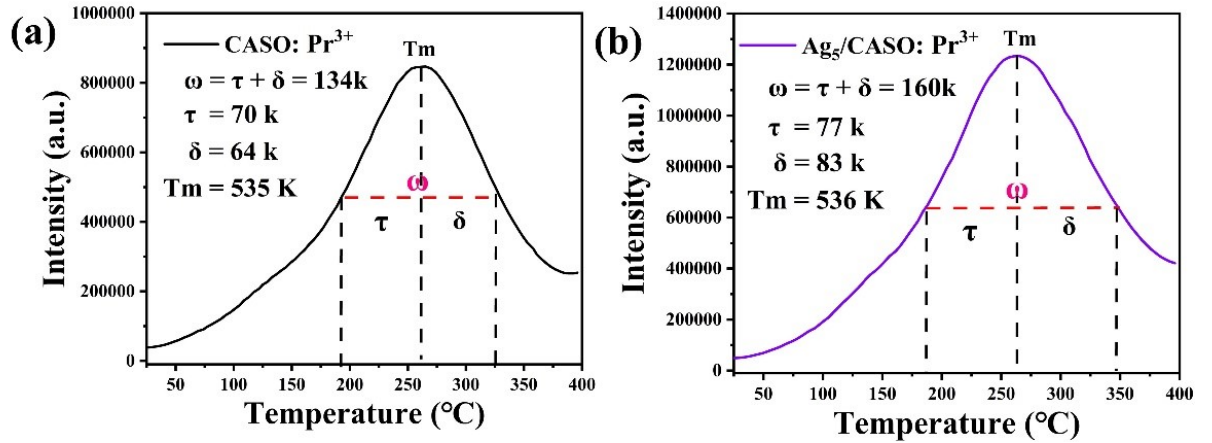

**Fig. S5** The long afterglow parameters of CASO: Pr<sup>3+</sup> and Ag/CASO: Pr<sup>3+</sup>.

**Table S1** The trap depth and trap charge concentration of CASO: Pr<sup>3+</sup> and Ag/CASO: Pr<sup>3+</sup> phosphors

| Samples                   | $T_m$ (K) | $\omega$ (K) | $\delta$ (K) | $\mu_g$ | $n_0$ (cm <sup>3</sup> ) <sup>-1</sup> | $E$ (eV) |
|---------------------------|-----------|--------------|--------------|---------|----------------------------------------|----------|
| CASO: Pr <sup>3+</sup>    | 535       | 134          | 64           | 0.48    | $9.06 \times 10^5$                     | 0.48     |
| Ag/CASO: Pr <sup>3+</sup> | 536       | 160          | 83           | 0.52    | $1.39 \times 10^7$                     | 0.45     |

**Table S2** Long afterglow lifetime parameters of CASO: Pr<sup>3+</sup> and Ag/CASO: Pr<sup>3+</sup>

| Samples                      | $\tau_1$ (s) | $\tau_2$ (s) | A <sub>1</sub> | A <sub>2</sub> | A <sub>1</sub> /A <sub>2</sub> | R <sup>2</sup> |
|------------------------------|--------------|--------------|----------------|----------------|--------------------------------|----------------|
| CASO: Pr <sup>3+</sup>       | 9.94         | 157.75       | 113440         | 65872          | 1.72                           | 0.9989         |
| Ag/CASO: Pr <sup>3+</sup> -1 | 10.08        | 170.05       | 121642         | 69917          | 1.73                           | 0.9996         |
| Ag/CASO: Pr <sup>3+</sup> -2 | 11.71        | 183.45       | 132453         | 76345          | 1.73                           | 0.9993         |
| Ag/CASO: Pr <sup>3+</sup> -3 | 11.96        | 205.06       | 155210         | 81078          | 1.91                           | 0.9997         |
| Ag/CASO: Pr <sup>3+</sup> -4 | 17.22        | 224.29       | 155318         | 82920          | 1.87                           | 0.9996         |
| Ag/CASO: Pr <sup>3+</sup> -5 | 20.20        | 253.68       | 162117         | 91242          | 1.77                           | 0.9989         |
| Ag/CASO: Pr <sup>3+</sup> -6 | 12.09        | 187.06       | 142539         | 94811          | 1.50                           | 0.9995         |

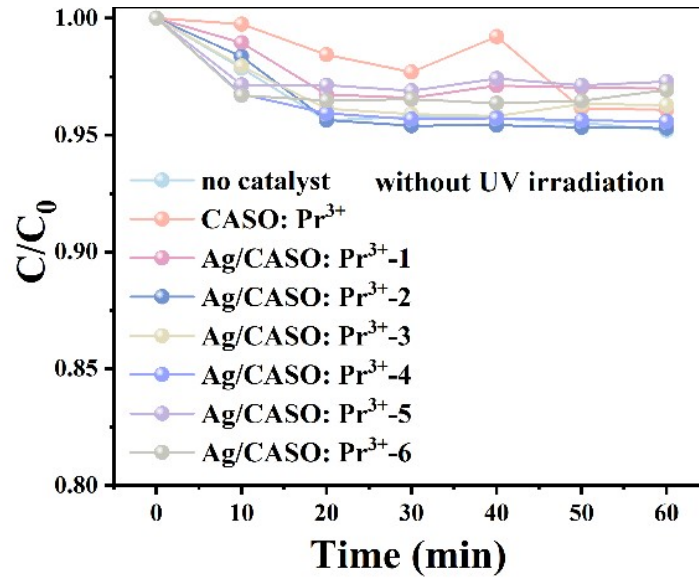**Fig. S6** The degradation efficiency of RhB without photocatalyst, CASO: Pr<sup>3+</sup> and Ag/CASO: Pr<sup>3+</sup> without UV irradiation.

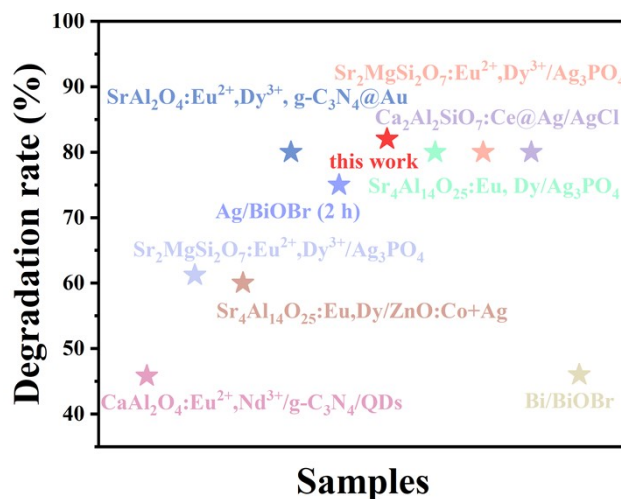

**Fig. S7** The comparison of degradation efficiency of  $\text{Ag}/\text{CASO}:\text{Pr}^{3+}$  with other photocatalysts.

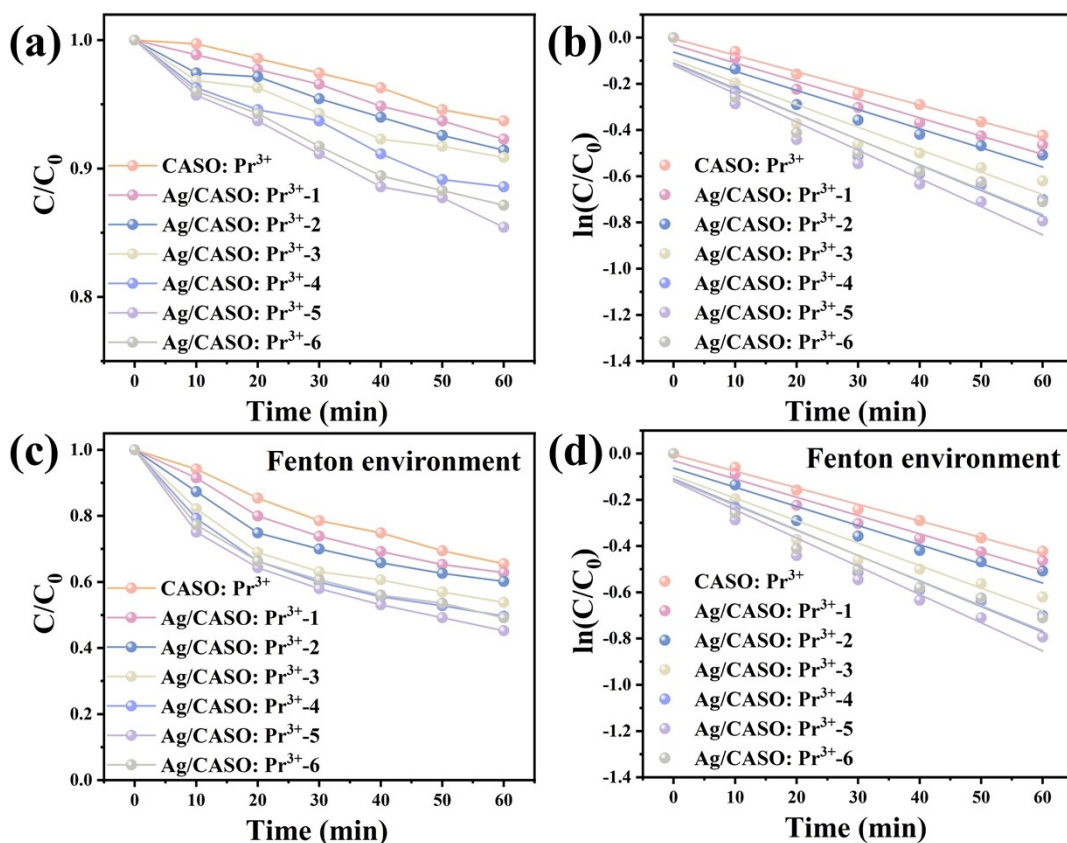

**Fig. S8** Photocatalytic performance of TC degradation of  $\text{CASO}:\text{Pr}^{3+}$  and  $\text{Ag}/\text{CASO}:\text{Pr}^{3+}$  phosphors irradiation with a 254 nm UV lamp. (b) The corresponding pseudo-first-order kinetics of  $\text{CASO}:\text{Pr}^{3+}$  and  $\text{Ag}/\text{CASO}:\text{Pr}^{3+}$  phosphors. (c) The photo-Fenton degradation performance for TC degradation of  $\text{CASO}:\text{Pr}^{3+}$  and  $\text{Ag}/\text{CASO}:\text{Pr}^{3+}$  phosphors. (d) The corresponding pseudo-first-order kinetics of  $\text{CASO}:\text{Pr}^{3+}$  and  $\text{Ag}/\text{CASO}:\text{Pr}^{3+}$  phosphors in photo-Fenton system.

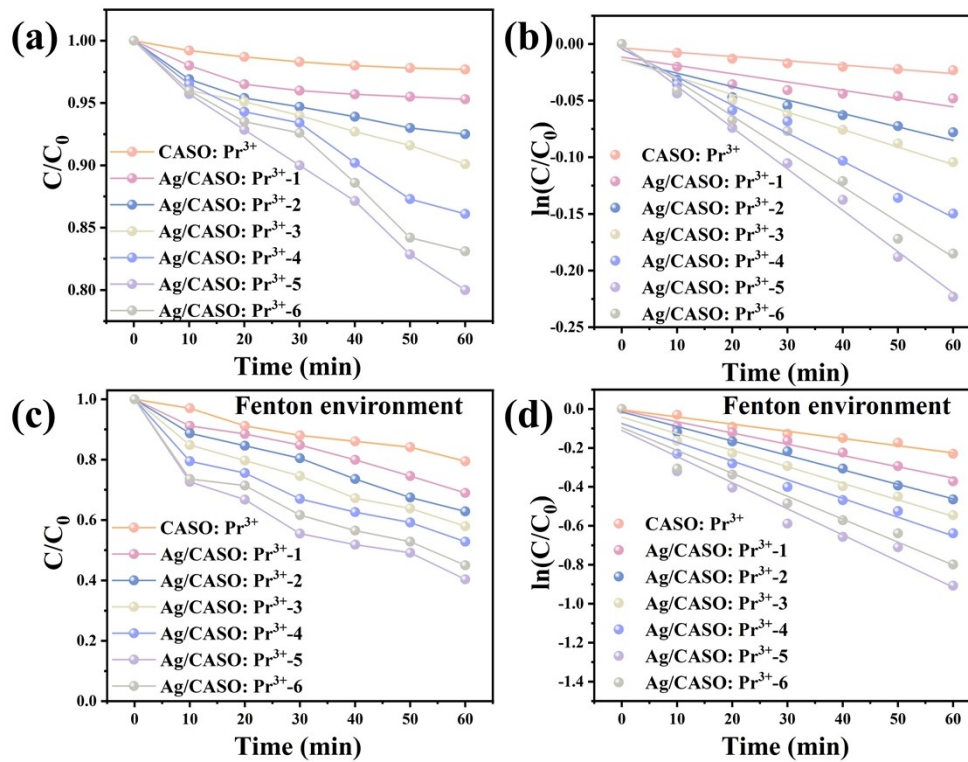

**Fig. S9** Photocatalytic performance of NFX degradation of CASO: Pr<sup>3+</sup> and Ag/CASO: Pr<sup>3+</sup> phosphors irradiation with a 254 nm UV lamp. (b) The corresponding pseudo-first-order kinetics of CASO: Pr<sup>3+</sup> and Ag/CASO: Pr<sup>3+</sup> phosphors. (c) The photo-Fenton degradation performance for NFX degradation of CASO: Pr<sup>3+</sup> and Ag/CASO: Pr<sup>3+</sup> phosphors. (d) The corresponding pseudo-first-order kinetics of CASO: Pr<sup>3+</sup> and Ag/CASO: Pr<sup>3+</sup> phosphors in photo-Fenton system.

**Table S3** The corresponding pseudo-first-order kinetics CASO: Pr<sup>3+</sup> and Ag/CASO: Pr<sup>3+</sup> phosphors

|                              | TC                       | TC (Fenton)              | NFX                      | NFX (Fenton)             |
|------------------------------|--------------------------|--------------------------|--------------------------|--------------------------|
| CASO: Pr <sup>3+</sup>       | 0.0011 min <sup>-1</sup> | 0.0071 min <sup>-1</sup> | 0.0004 min <sup>-1</sup> | 0.0037 min <sup>-1</sup> |
| Ag/CASO: Pr <sup>3+</sup> -1 | 0.0013 min <sup>-1</sup> | 0.0079 min <sup>-1</sup> | 0.0007 min <sup>-1</sup> | 0.0057 min <sup>-1</sup> |
| Ag/CASO: Pr <sup>3+</sup> -2 | 0.0014 min <sup>-1</sup> | 0.0082 min <sup>-1</sup> | 0.0012 min <sup>-1</sup> | 0.0074 min <sup>-1</sup> |
| Ag/CASO: Pr <sup>3+</sup> -3 | 0.0016 min <sup>-1</sup> | 0.0097 min <sup>-1</sup> | 0.0015 min <sup>-1</sup> | 0.0085 min <sup>-1</sup> |
| Ag/CASO: Pr <sup>3+</sup> -4 | 0.0019 min <sup>-1</sup> | 0.0110 min <sup>-1</sup> | 0.0025 min <sup>-1</sup> | 0.0096 min <sup>-1</sup> |
| Ag/CASO: Pr <sup>3+</sup> -5 | 0.0025 min <sup>-1</sup> | 0.0122 min <sup>-1</sup> | 0.0037 min <sup>-1</sup> | 0.0134 min <sup>-1</sup> |
| Ag/CASO: Pr <sup>3+</sup> -6 | 0.0022 min <sup>-1</sup> | 0.0108 min <sup>-1</sup> | 0.0031 min <sup>-1</sup> | 0.0117 min <sup>-1</sup> |

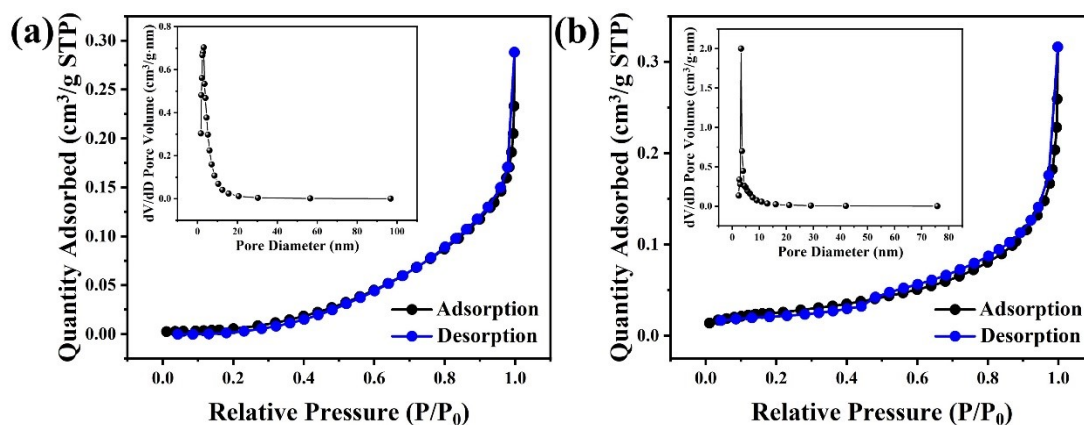

**Fig. S10** (a) Nitrogen adsorption-desorption curves and (b) pore size distributions curves of CASO: Pr<sup>3+</sup> and Ag/CASO: Pr<sup>3+</sup> phosphors.

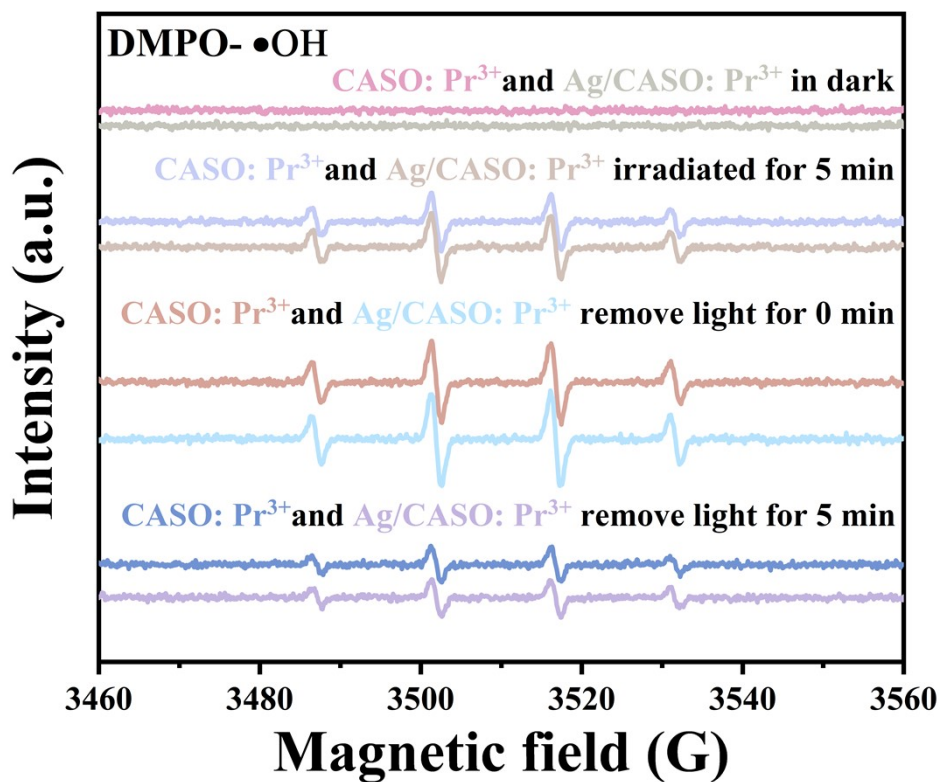

**Fig. S11** The ESR spectra of DMPO-•OH in CASO: Pr<sup>3+</sup> and Ag/CASO: Pr<sup>3+</sup> in the dark, after 5 min of light, after 0 min of irradiation and after 5 min of irradiation.

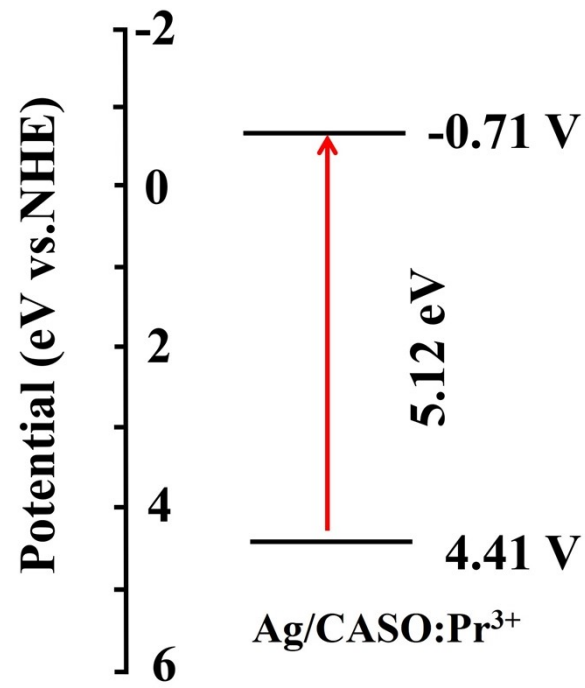

Fig. S12 The band structure diagram of Ag/CASO: Pr<sup>3+</sup>
